# Supplementary material
Source: PubMed Central journal article supplement (PMC3711204)
Supplement: supp_126.14.3151_JCS124586.pdf [file supp_126.14.3151_JCS124586.pdf]

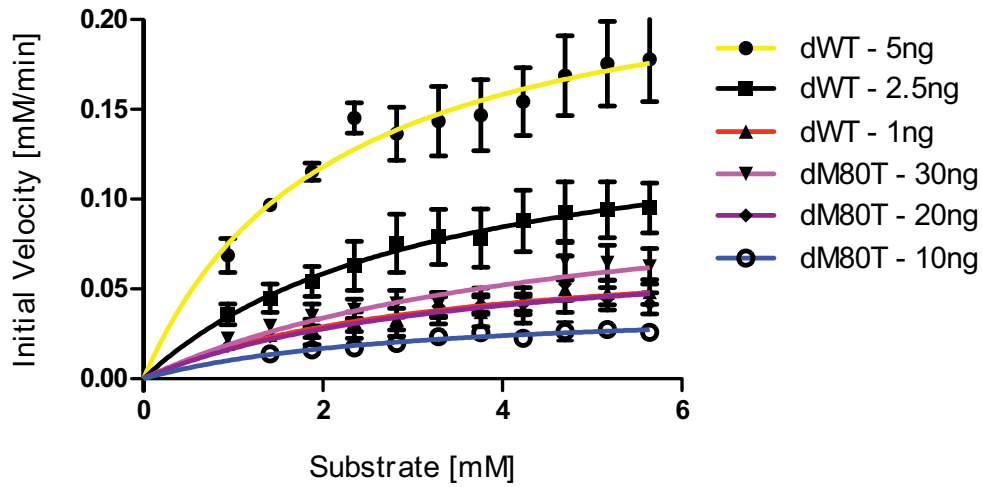

**Fig. S1.** Both *Drosophila* wild type (dWT) and *sugarkill* (dM80T) enzymes follow traditional Michaelis-Menten kinetics. Michaelis-Menten nonlinear regression fits are shown, and all enzyme concentrations are indicated.

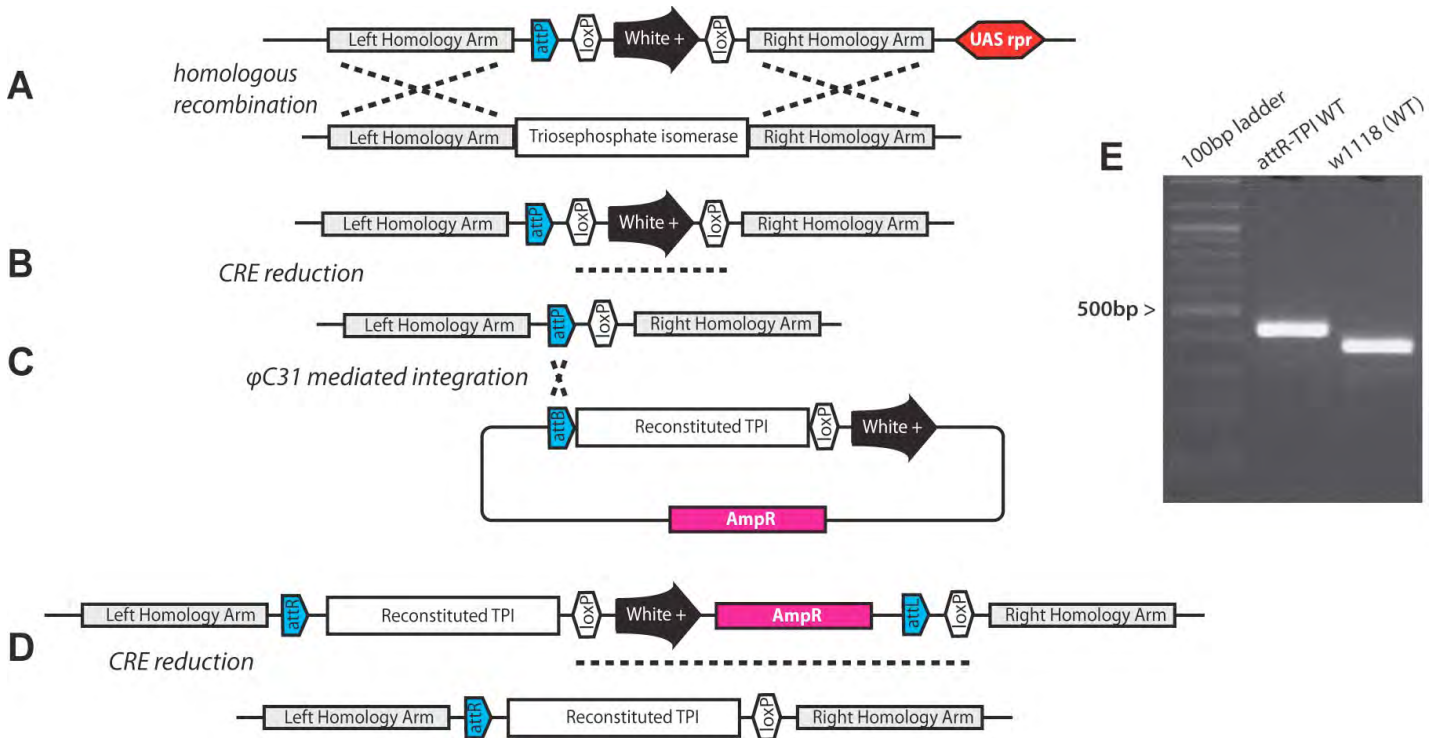

**Fig. S2.** Genomic engineering of the *TPI* locus. A) The target gene is replaced by the *attP* phiC31 integration site and a white minigene flanked by two *loxP* sites. B) The white minigene is removed by a CRE recombinase, leaving only the *attP* phiC31 integration site and a *loxP* site. C) *TPI* is cloned into the *pGE-attB* vector and modified, as desired. The construct is then injected into founder line embryos expressing the phiC31 integrase, which initiates specific and directional integration of the construct into the *TPI* locus. D) The *white* minigene and plasmid construct are removed through the expression of CRE recombinase, leaving only an *attR* and a *loxP* site. E) Molecular analysis reveals the addition of an *attR* site 5' of the reconstituted *TPI* gene.

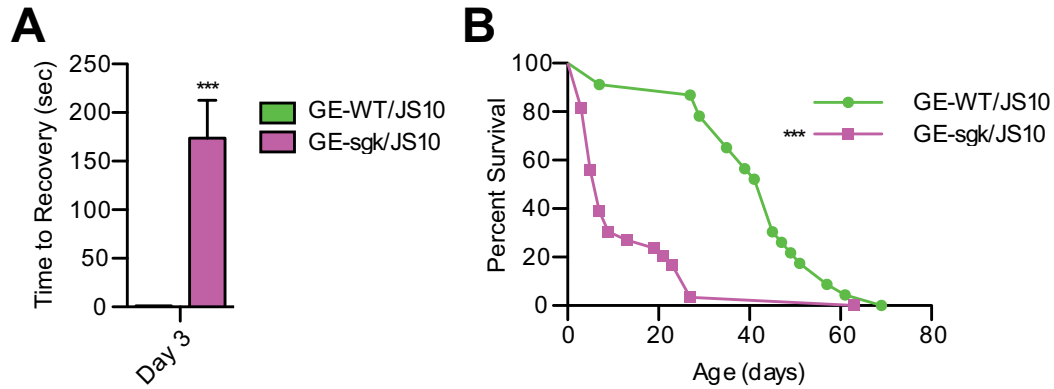

**Fig. S3.** Genomically engineered  $TPI^{sgk}$  displays aberrant behavior and reduced longevity. A) Genomically engineered  $TPI^+$  ( $GE-WT$ ) displays normal behavior, while the genomically engineered  $TPI^{sgk}$  ( $GE-sgk$ ) displays marked mechanical stress sensitivity. B)  $GE-sgk$  exhibits reduced longevity compared to  $GE-WT$ .  $n > 20$  for all lifespans and behavior. A Student's t test was used to assess behavioral differences between genotypes, and a Log-rank (Mantel-Cox) Test was used to assess lifespans. \*\*\* indicates  $p < 0.0001$  compared to  $GE-WT$ . Error bars indicate  $\pm$  s.e.m. Both genomically engineered alleles were assessed over  $TPI^{JS10}$ .

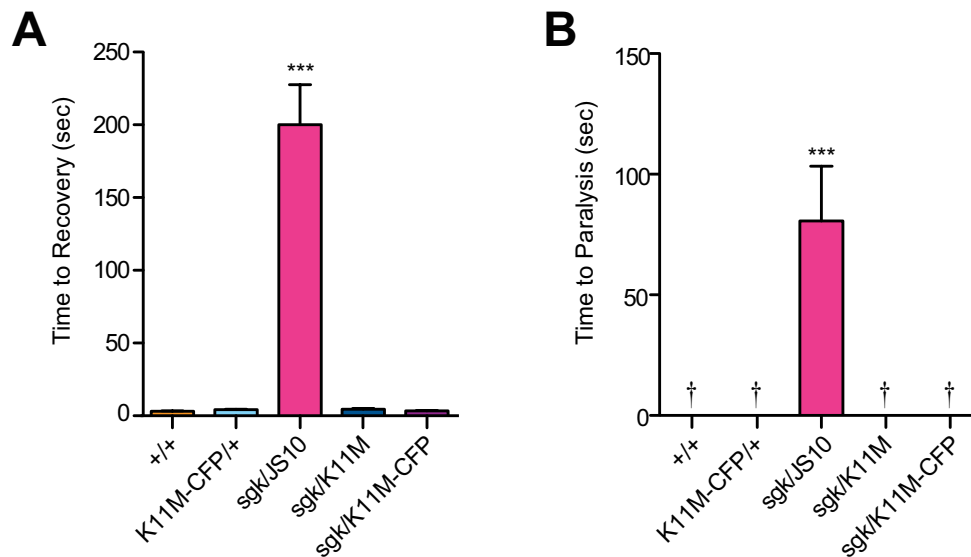

**Fig. S4.** The addition of the C-terminal CFP to  $TPI^{K11M}$  does not affect its capacity to genetically complement  $TPI^{sgk}$  A) mechanical stress sensitivity or B) thermal stress sensitivity. Mechanical stress sensitivity was assessed on Day 1 and thermal stress sensitivity was assessed on Day 5.  $n > 15$ . † indicates animals did not paralyze. A One-way ANOVA was performed to assess variance and data sets were compared using Tukey's post-hoc analysis. \*\*\* indicates that  $p < 0.001$  and  $ns$  indicates no significant difference, both compared to WT. Error bars indicate  $\pm$  s.e.m.

**Table S1.** The catalytically inactive allele complements  $TP1^{sgk}$  median lifespans.  $n > 150$  animals per genotype for all lifespans.

|                           | +/+  | sgk/+ | sgk/sgk | sgk/JS10 | sgk/K11M |
|---------------------------|------|-------|---------|----------|----------|
| Median Lifespan<br>(days) | 65.5 | 67    | 29      | 6        | 73       |
